# Supplementary material
Source: PubMed Central journal article supplement (PMC4960006)
Supplement: NIHMS742084-supplement-1.pdf [file NIHMS742084-supplement-1.pdf]

## Supplemental Figures

**Figure S1.** Expression of miR-19a did not affect  $\beta$ -Gal/HT29 cell growth, migration and invasion.  $\beta$ -Gal/HT29 cells were transfected with pre-miR-19a in the culture medium containing  $\text{ZnCl}_2$  and then subjected to colony growth (A), wound healing and 2-chamber cell invasion assay (B).

**Figure S2.** APC repressed cell growth, migration and invasion were abrogated by enforced expression of miR-19a. HCT15 cells, which carry APC mutation, were transfected with APC together with and without pre-miR-19a and then assayed for colony growth (A), cell migration and invasion (B).

**Figure S3.** Knockdown of miR-19a reduces colony growth, cell migration and invasion in HCT15 cells. Anti-miR-19a and control oligo were introduced into HCT15 cells and then subjected to colony formation (A), wound healing and 2-chamber invasion assays (B).

**Figure S4.** Expression of miR-19a in NCI-H508 cells promotes colony growth, cell migration and invasion. Pre-miR-19a and control oligo were introduced into NCI-H508 cells, in which both APC and  $\beta$ -catenin are wild type. After incubation for 36 hours, cells are assayed for colony formation (A), cell migration and invasion (B).

**A**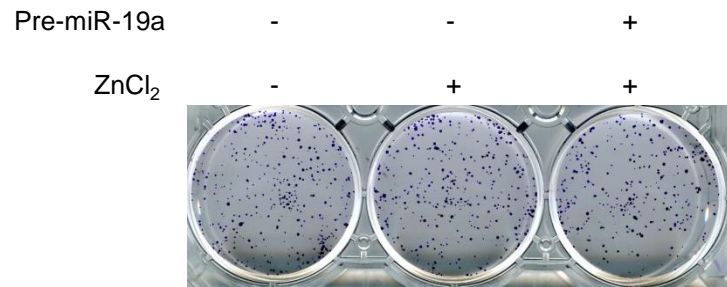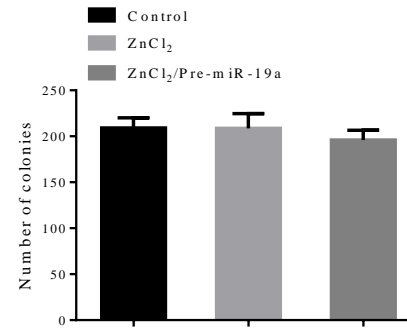**B**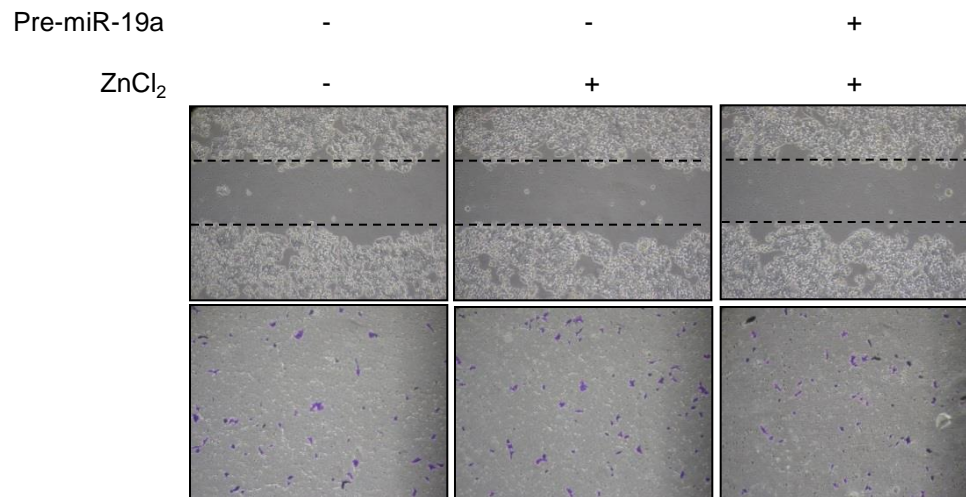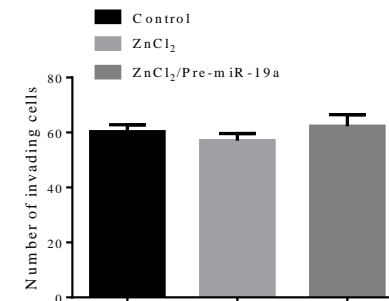

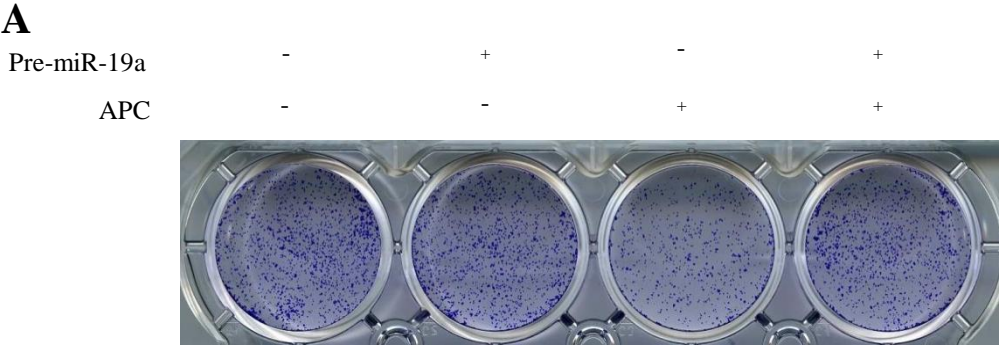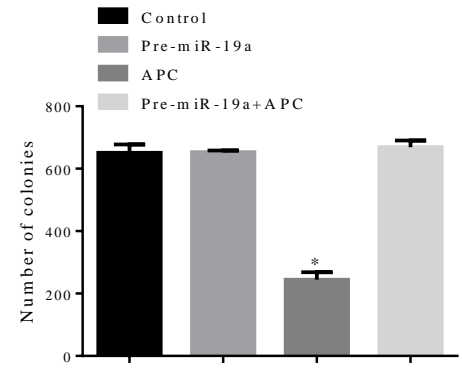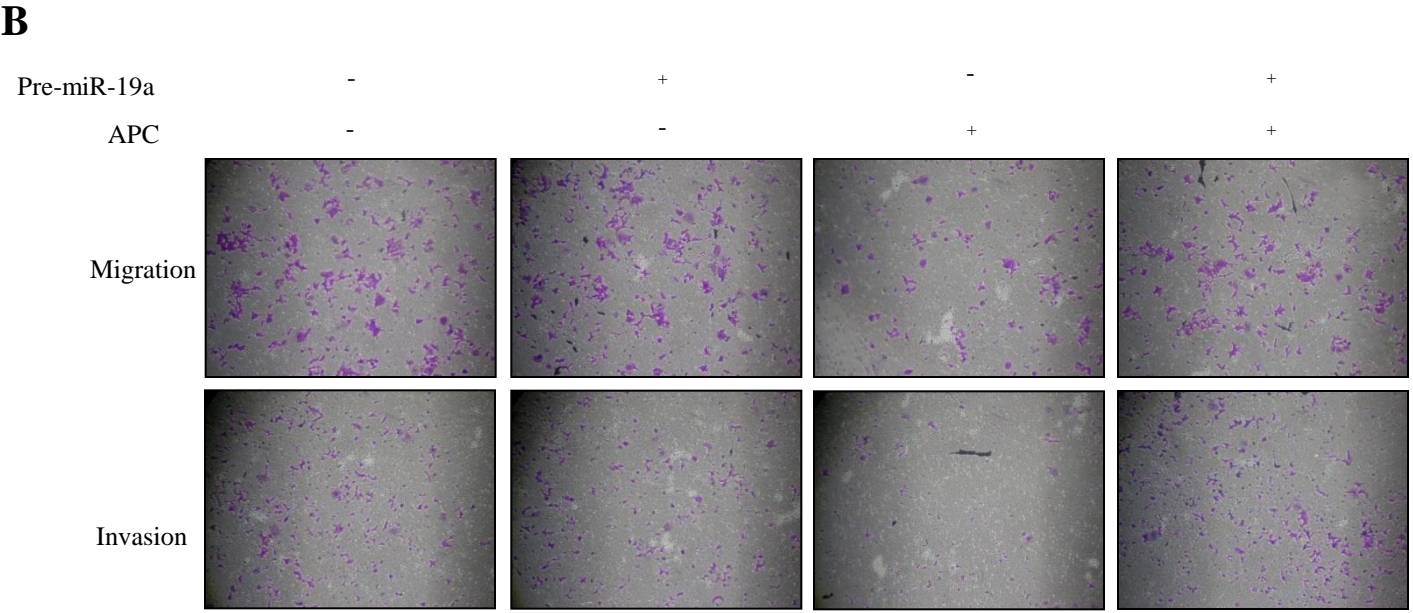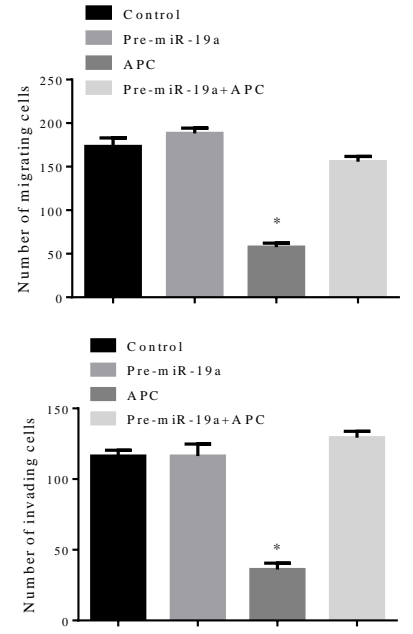

Supplemental Fig. 3

**A**

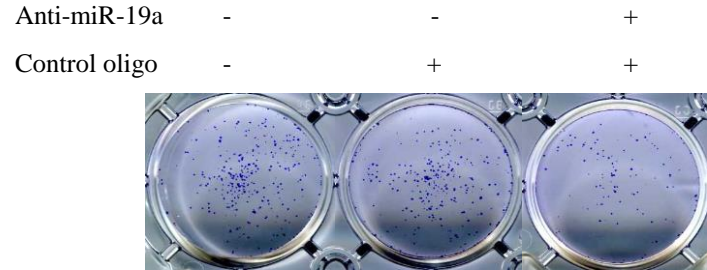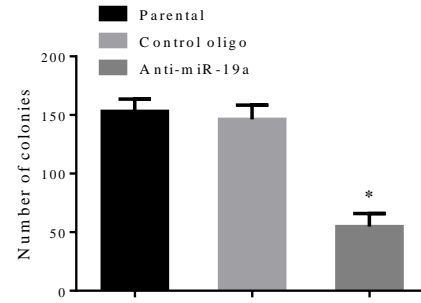

**B**

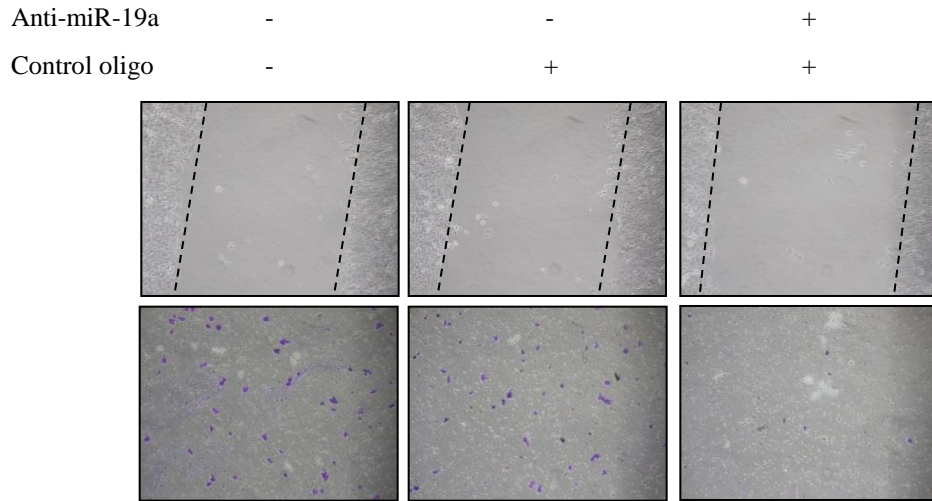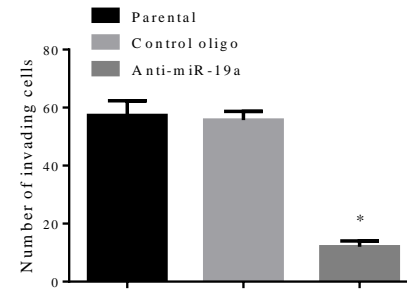

Supplemental Fig. 3

**A**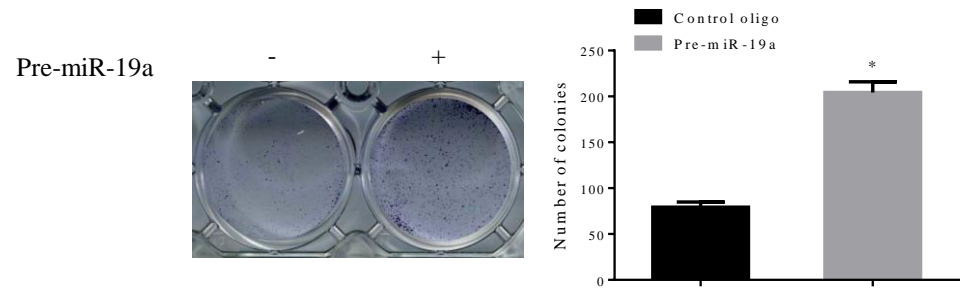**B**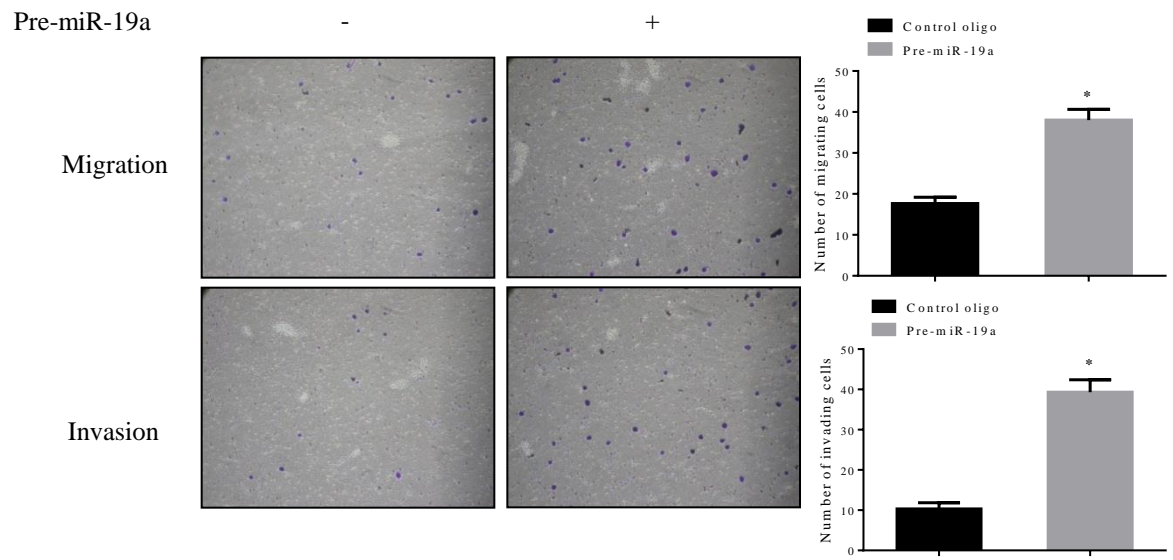

Supplemental Fig. 4
